# Supplementary material
Source: PubMed Central journal article supplement (PMC7062195)
Supplement: supp_RA119.012231_157596_2_supp_463610_q4jtgz.pdf [file supp_RA119.012231_157596_2_supp_463610_q4jtgz.pdf]

# Figure S1

**A**

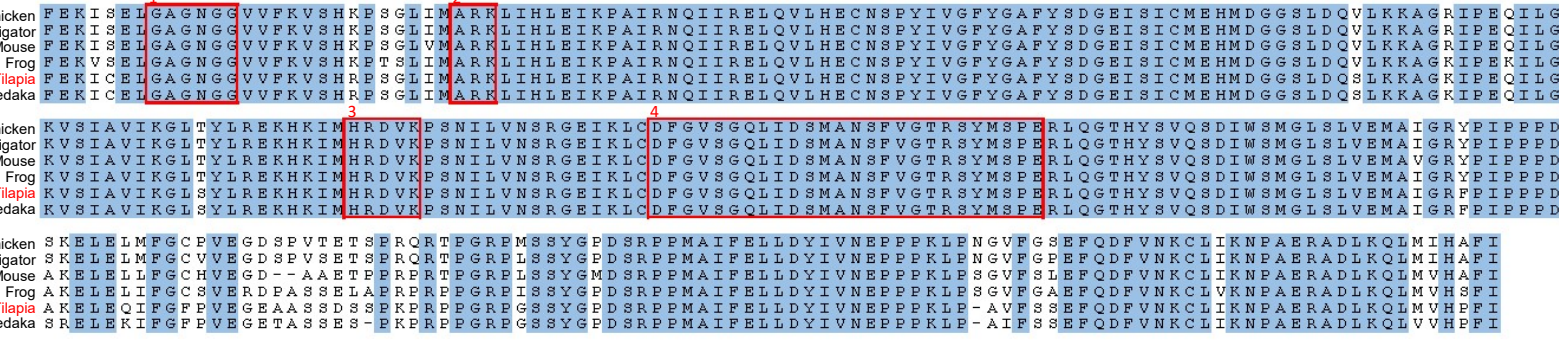

**B**

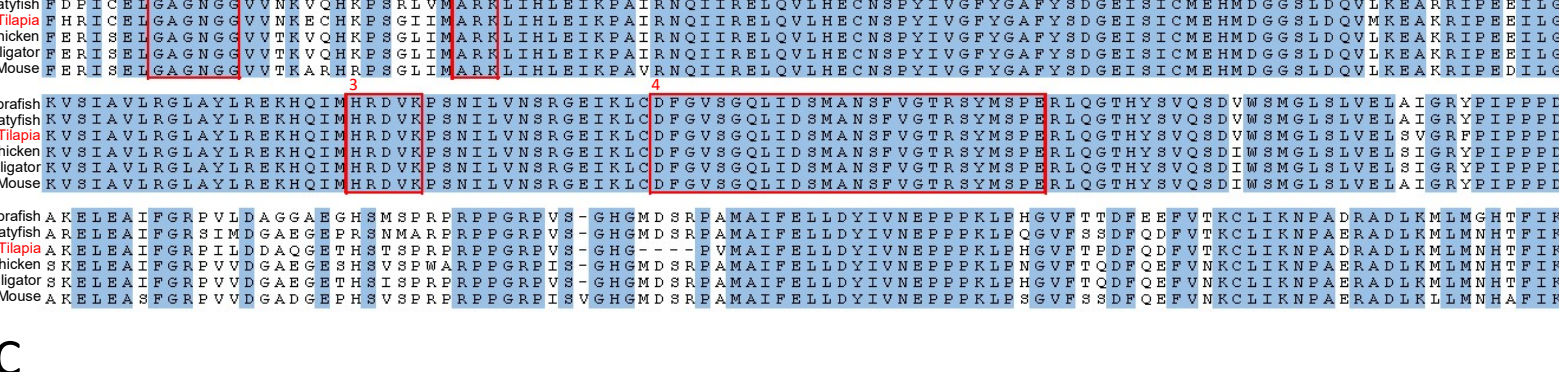

**C**

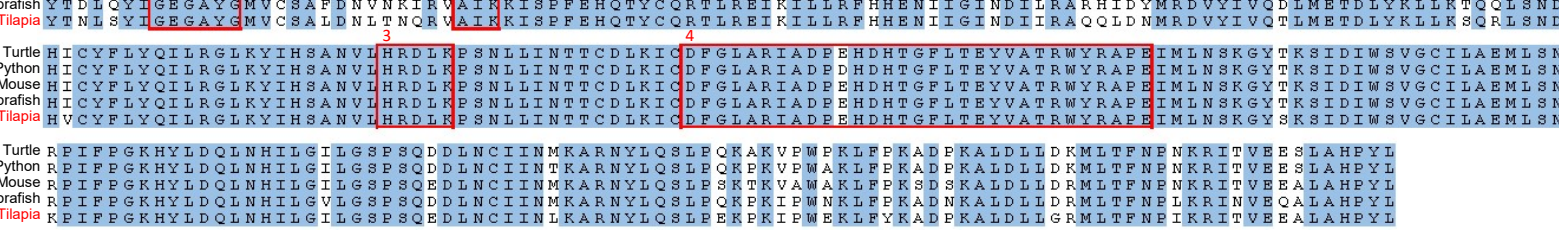

Figure S1. Multisequence alignment analysis of S/TKc domain in Mek1 (A), Mek2 (B) and Erk1 (C) from the indicated species. Amino acid residues with 100% identity are in blue, and similar amino acids are in white. The four conserved motifs are boxed: 1. Gly-rich region (GxGxxG) was an ATP binding loop; 2. AxK motif could couple with ATP phosphate group; 3. HRDxK motif is the catalytic loop; 4. Activation segment (starting with DFG, ending with APE or SPE) of almost all protein kinases. The accession numbers of selected sequences are listed in Table S1.
