# Supplementary material
Source: PubMed Central journal article supplement (PMC7062195)
Supplement: supp_RA119.012231_157596_2_supp_463612_q4jtgz.pdf [file supp_RA119.012231_157596_2_supp_463612_q4jtgz.pdf]

Table S1. Information of genes used for sequence, phylogeny and structure analysis in present study

| Source  | Accession No.     | Gene name | Species                              | Application      |
|---------|-------------------|-----------|--------------------------------------|------------------|
| GenBank | XP_019217488.1    | hRas      | <i>Oreochromis niloticus</i>         | DP,DOA           |
| GenBank | XP_003439035.4    | cRaf      | <i>Oreochromis niloticus</i>         | DP,DOA           |
| GenBank | XP_003440493.1    | MEK1      | <i>Oreochromis niloticus</i>         | DP,DOA,MSA,3D,PA |
| KEGG    | 5604              | MEK1      | <i>Homo sapiens</i>                  | PA               |
| KEGG    | 100446021         | MEK1      | <i>Pongo abelii</i>                  | PA               |
| KEGG    | 100009316         | MEK1      | <i>Oryctolagus cuniculus</i>         | PA               |
| KEGG    | 478347            | MEK1      | <i>Canis familiaris</i>              | PA               |
| KEGG    | 26395             | MEK1      | <i>Mus musculus</i>                  | MSA,3D,PA        |
| KEGG    | 170851            | MEK1      | <i>Rattus norvegicus</i>             | PA               |
| KEGG    | 415549            | MEK1      | <i>Gallus gallus</i>                 | MSA,PA           |
| KEGG    | 102096091         | MEK1      | <i>Columba livia</i>                 | PA               |
| KEGG    | 104683880         | MEK1      | <i>Corvus cornix</i>                 | PA               |
| KEGG    | 102563228         | MEK1      | <i>Alligator mississippiensis</i>    | PA               |
| KEGG    | 102373880         | MEK1      | <i>Alligator sinensis</i>            | MSA,PA           |
| KEGG    | 101949355         | MEK1      | <i>Chrysemys picta</i>               | PA               |
| KEGG    | 108712802         | MEK1      | <i>Xenopus laevis</i>                | MSA,PA           |
| KEGG    | 493420            | MEK1      | <i>Xenopus tropicalis</i>            | PA               |
| KEGG    | 108784101         | MEK1      | <i>Nanorana parkeri</i>              | PA               |
| KEGG    | 406728            | MEK1      | <i>Danio rerio</i>                   | PA               |
| KEGG    | 101162677         | MEK1      | <i>Oryzias latipes</i>               | MSA,PA           |
| KEGG    | 104922316         | MEK1      | <i>Larimichthys crocea</i>           | PA               |
| KEGG    | 110160811         | MEK1      | <i>Boleophthalmus pectinirostris</i> | PA               |
| KEGG    | 107388720         | MEK1      | <i>Nothobranchius furzeri</i>        | PA               |
| KEGG    | 103186399         | MEK1      | <i>Callorhinchus milii</i>           | PA               |
| GenBank | XP_020378439.1    | MEK1      | <i>Rhincodon typus</i>               | PA               |
| KEGG    | BRAFLDRAFT_124326 | MEK1      | <i>Branchiostoma floridae</i>        | PA               |
| GenBank | XP_781505.3       | MEK1      | <i>Strongylocentrotus purpuratus</i> | PA               |
| GenBank | XP_011677450.1    | MEK1      | <i>Strongylocentrotus purpuratus</i> | PA               |
| KEGG    | Dmel_CG15793      | MEK1      | <i>Drosophila melanogaster</i>       | PA               |
| KEGG    | 100742289         | MEK1      | <i>Bombus impatiens</i>              | PA               |
| KEGG    | KGM_206256        | MEK1      | <i>Danaus plexippus</i>              | PA               |
| KEGG    | 105339480         | MEK1      | <i>Crassostrea gigas</i>             | PA               |
| KEGG    | 106880850         | MEK1      | <i>Octopus bimaculoides</i>          | PA               |
| KEGG    | LOAG_12861        | MEK1      | <i>Loa loa</i>                       | PA               |
| KEGG    | Tsp_10801         | MEK1      | <i>Trichinella spiralis</i>          | PA               |
| GenBank | XP_003438241.1    | MEK2      | <i>Oreochromis niloticus</i>         | DP,DOA,MSA,3D,PA |
| KEGG    | 5605              | MEK2      | <i>Homo sapiens</i>                  | PA               |
| KEGG    | 26396             | MEK2      | <i>Mus musculus</i>                  | MSA,3D,PA        |
| KEGG    | 100450988         | MEK2      | <i>Pongo abelii</i>                  | PA               |
| KEGG    | 58960             | MEK2      | <i>Rattus norvegicus</i>             | PA               |
| KEGG    | 109687808         | MEK2      | <i>Castor canadensis</i>             | PA               |

|         |                |            |                                    |                  |
|---------|----------------|------------|------------------------------------|------------------|
| KEGG    | 396349         | MEK2       | <i>Gallus gallus</i>               | MSA,PA           |
| KEGG    | 107215477      | MEK2       | <i>Parus major</i>                 | PA               |
| KEGG    | 100551337      | MEK2       | <i>Meleagris gallopavo</i>         | PA               |
| KEGG    | 102375508      | MEK2       | <i>Alligator sinensis</i>          | MSA,PA           |
| KEGG    | 106736997      | MEK2       | <i>Alligator mississippiensis</i>  | PA               |
| KEGG    | 102931357      | MEK2       | <i>Chelonia mydas</i>              | PA               |
| KEGG    | 110072466      | MEK2       | <i>Pogona vitticeps</i>            | PA               |
| KEGG    | 100002225      | MEK2       | <i>Danio rerio</i>                 | MSA,PA           |
| KEGG    | 102225775      | MEK2       | <i>Xiphophorus maculatus</i>       | MSA,PA           |
| KEGG    | 112250875      | MEK2       | <i>Oncorhynchus tshawytscha</i>    | PA               |
| KEGG    | 107719582      | MEK2       | <i>Sinocyclocheilus rhinoceros</i> | PA               |
| KEGG    | 107586388      | MEK2       | <i>Sinocyclocheilus grahami</i>    | PA               |
| KEGG    | 101173453      | MEK2       | <i>Oryzias latipes</i>             | PA               |
| KEGG    | 103183530      | MEK2       | <i>Callorhynchus milii</i>         | PA               |
| GenBank | XP_020366735.1 | MEK2       | <i>Rhincodon typus</i>             | PA               |
| UniProt | A0A2S2NGA6     | MEK2       | <i>Schizaphis graminum</i>         | PA               |
| UniProt | A0A2P8XJR2     | MEK2       | <i>Blattella germanica</i>         | PA               |
| UniProt | A0A0B2UUA8     | MEK2       | <i>Toxocara canis</i>              | PA               |
| GenBank | CAA98732.1     | MEK2       | <i>Saccharomyces cerevisiae</i>    | PA               |
| GenBank | XP_003454034.2 | MAPK3/ERK1 | <i>Oreochromis niloticus</i>       | DP,DOA,MSA,3D,PA |
| KEGG    | 5595           | MAPK3/ERK1 | <i>Homo sapiens</i>                | PA               |
| KEGG    | 454037         | MAPK3/ERK1 | <i>Pan troglodytes</i>             | PA               |
| KEGG    | 26417          | MAPK3/ERK1 | <i>Mus musculus</i>                | MSA,3D,PA        |
| KEGG    | 50689          | MAPK3/ERK1 | <i>Rattus norvegicus</i>           | PA               |
| KEGG    | 103059169      | MAPK3/ERK1 | <i>Python bivittatus</i>           | MSA,PA           |
| KEGG    | 114582021      | MAPK3/ERK1 | <i>Podarcis muralis</i>            | PA               |
| GenBank | JAB54277.1     | MAPK3/ERK1 | <i>Micrurus fulvius</i>            | PA               |
| KEGG    | 399480         | MAPK3/ERK1 | <i>Danio rerio</i>                 | MSA,PA           |
| GenBank | NP_001167267.1 | MAPK3/ERK1 | <i>Salmo salar</i>                 | PA               |
| GenBank | AKC01948.1     | MAPK3/ERK1 | <i>Clarias batrachus</i>           | PA               |
| GenBank | TSK28023.1     | MAPK3/ERK1 | <i>Bagarius yarrelli</i>           | PA               |
| GenBank | ATA63313.1     | MAPK3/ERK1 | <i>Siniperca chuatsi</i>           | PA               |
| GenBank | SBQ96754.1     | MAPK3/ERK1 | <i>Nothobranchius kuhntae</i>      | PA               |
| GenBank | SBP09727.1     | MAPK3/ERK1 | <i>Iconisemion striatum</i>        | PA               |
| GenBank | XP_006005975.1 | MAPK3/ERK1 | <i>Latimeria chalumnae</i>         | PA               |
| KEGG    | 101937531      | MAPK3/ERK1 | <i>Chrysemys picta</i>             | MSA              |
| GenBank | XP_003444522.1 | MAPK1/ERK2 | <i>Oreochromis niloticus</i>       | DP,DOA,MSA,3D,PA |
| KEGG    | 5594           | MAPK1/ERK2 | <i>Homo sapiens</i>                | PA               |
| KEGG    | 458680         | MAPK1/ERK2 | <i>Pan troglodytes</i>             | PA               |
| KEGG    | 26413          | MAPK1/ERK2 | <i>Mus musculus</i>                | MSA,3D,PA        |
| KEGG    | 373953         | MAPK1/ERK2 | <i>Gallus gallus</i>               | MSA,PA           |
| KEGG    | 106486864      | MAPK1/ERK2 | <i>Apteryx australis mantelli</i>  | PA               |
| KEGG    | 102561718      | MAPK1/ERK2 | <i>Alligator mississippiensis</i>  | MSA,PA           |
| KEGG    | 101936664      | MAPK1/ERK2 | <i>Chrysemys picta</i>             | PA               |

|      |                  |            |                                 |        |
|------|------------------|------------|---------------------------------|--------|
| KEGG | 549881           | MAPK1/ERK2 | <i>Xenopus tropicalis</i>       | PA     |
| KEGG | 108794889        | MAPK1/ERK2 | <i>Nanorana parkeri</i>         | PA     |
| KEGG | 360144           | MAPK1/ERK2 | <i>Danio rerio</i>              | MSA,PA |
| KEGG | 108255782        | MAPK1/ERK2 | <i>Ictalurus punctatus</i>      | PA     |
| KEGG | 104932685        | MAPK1/ERK2 | <i>Larimichthys crocea</i>      | PA     |
| KEGG | 108891348        | MAPK1/ERK2 | <i>Lates calcarifer</i>         | PA     |
| KEGG | 106570952        | MAPK1/ERK2 | <i>Salmo salar</i>              | PA     |
| KEGG | 103188576        | MAPK1/ERK2 | <i>Callorhinchus milii</i>      | PA     |
| KEGG | BRAFLDRAFT_60037 | MAPK1/ERK2 | <i>Branchiostoma floridae</i>   | PA     |
| KEGG | 100376998        | MAPK1/ERK2 | <i>Saccoglossus kowalevskii</i> | PA     |
| KEGG | Dmel_CG12559     | MAPK1/ERK2 | <i>Drosophila melanogaster</i>  | PA     |
| KEGG | 101889743        | MAPK1/ERK2 | <i>Musca domestica</i>          | PA     |
| KEGG | AgaP_AGAP009207  | MAPK1/ERK2 | <i>Anopheles gambiae</i>        | PA     |
| KEGG | 5578960          | MAPK1/ERK2 | <i>Aedes aegypti</i>            | PA     |
| KEGG | 100743744        | MAPK1/ERK2 | <i>Bombus impatiens</i>         | PA     |
| KEGG | 692466           | MAPK1/ERK2 | <i>Bombyx mori</i>              | PA     |
| KEGG | 105334418        | MAPK1/ERK2 | <i>Crassostrea gigas</i>        | PA     |
| KEGG | 110461316        | MAPK1/ERK2 | <i>Mizuhopecten yessoensis</i>  | PA     |

---

Note:

MSA: multiple sequence alignment; PA: phylogenetic analysis; 3D: 3D structure analysis; DOA: domain organization analysis; DP: domain prediction.
