# Supplementary material
Source: PubMed Central journal article supplement (PMC7062195)
Supplement: supp_RA119.012231_157596_2_supp_463613_q4jtgf.pdf [file supp_RA119.012231_157596_2_supp_463613_q4jtgf.pdf]

Table S2. Information and primers of Nile tilapia genes used in present study

| accession No.        | Primer name    | Forward (5'-3')           | Reverse (5'-3')           |
|----------------------|----------------|---------------------------|---------------------------|
| KJ126772.1           | $\beta$ -actin | CGGAATCCACGAAACCACCTA     | CCAGACGGAGTATTTACGCTCA    |
| XM_003440445.4       | MEK1           | TGGGTCTGTCACTGGTTGAAATG   | CACTGGGAAGCCGAAAATCTGT    |
| XM_003438193.4       | MEK2           | TGGACCAGGTGATGAAAGAAGCA   | CGTGAGTTTACCAGGATGTTTGAGG |
| XM_003444474.5       | ERK2           | GCACCTCTGACCACACCCAACT    | TGCTCGTTTTTGGCCGACTTTC    |
| XM_003453986.5       | ERK1           | CTGCTCTGGACAACCTGACA      | CCCTGATGATGTCGTTGATG      |
| XM_019361943         | h-Ras          | AAGCAGGTTGTGATAGACGGGGA   | AGACTTGGTATTGTTGATGGCGAA  |
| XM_003438987         | c-Raf          | TGAAAAGGTTGGTGGCTGACTG    | CGGTTTATCTTAGGGAGGGCAT    |
| N287402.1            | IFN- $\gamma$  | GGGTGGTGTTTTGGAGTCGT      | GTAGCGAGCCTGAGTTGTTGGTG   |
| XM_019360337.1       | CD122          | GGAGGTGTGTTTGGCAAGTT      | ATGCCCTCATCCTGACTCAG      |
| XM_003449297.5       | CD3 $\epsilon$ | CTGGAGGACCAAAGTGACG       | CACGCATTTCCCTCAACA        |
| ENSONIT00000025699.1 | CD8 $\alpha$   | CATAACAGCAAAGGAAGGACAG    | TACCTTGGATAAGTGACGCA      |
| ENSONIT00000016394   | CD4-1          | CCAAGGGAAACAGAGAAGGAAA    | AAGGGATGGTGAGAGGTGAAAC    |
| ENSONIT00000016389   | CD4-2          | GTGACAGAAACAGATGCTGGAAAC  | CACAACTTTGGGGCTGACCTT     |
| XM_003439678.4       | Granzyme B     | GAGCATTTTGTGGTACTGCTGC    | CACGGTCTGCGAGAGGAATAGGT   |
| XM_005464289.3       | LT- $\alpha$   | GGTGCCAGAGATGGCTTGTA      | TTGTGTGGATTGATGAGAGGAGAGT |
| KM008610.1           | FasL           | CTTGGTTGGCGTAGTGGTGCT     | ATGCCTCTAAGAACAGAATGCGTC  |
| XM_005458023.4       | KLRG1          | CAGAAGTGGTAACAGAGGAAAAGAC | TGTAGTCCATCTCCTGCCCATC    |
| XM_003448658.4       | T-bet          | ACCTCGGTCACCCAATAAATC     | CACCCACACCTCCCTCAAAT      |
| XM_003440392.5       | LDHA           | AGGGCGAAAGCCGTCTCAATC     | GAGGTTAGTGCCAGAGCCAATCA   |
| XM_003448146.4       | PFK            | AAAGGAGGTTCAATGTTGGGCA    | CGTTGTTGGATACGGTGGCA      |
| XM_003448615.4       | HK2            | TGAGGGGCGGATGTGTGTAA      | TGCTTGCCAGGGTTGAATGA      |
| XM_003437654.5       | PKM            | CTTCCTCGCCCAGAAAATGA      | GGATAGTCTCCCTTGGCAGTC     |
| FJ914655.1           | Glut1          | TCAACAAGAACGAAGAGAACAAGG  | GGCTCCAATGGTGGCATAAAT     |
| XM_005448983.3       | c-Myc          | CTCGGTGGTTTTCCCGTATCC     | CGTGTCCAGTCCCAAATCCTT     |
